# Supplementary material
Source: HighWire-hosted journal article supplement (https://www.jrheum.org/highwire/filestream/42173/field_highwire_adjunct_files/0/220007DataSuppl.pdf)
Supplement: 220007DataSuppl.pdf [file 220007DataSuppl.pdf]

**Supplemental Table: Characteristics of children who tapered or discontinued methotrexate (MTX)**

| Patient | Sex | Taper (T) /<br>Discontinue<br>without taper<br>(D) | Type of<br>Uveitis | Uveitis<br>Dx Age<br>(yrs) | Location                     | Laterality | MTX<br>Route | Age at<br>MTX<br>Start<br>(yrs) | Time to<br>start<br>MTX<br>(yrs) | Therapy<br>Duration<br>(yrs) | Relapse | Time to<br>Relapse (mos) |
|---------|-----|----------------------------------------------------|--------------------|----------------------------|------------------------------|------------|--------------|---------------------------------|----------------------------------|------------------------------|---------|--------------------------|
| 1       | F   | T                                                  | JIA-U              | 2.6                        | Anterior                     | Both       | SQ           | 2.7                             | 0.1                              | 1.8                          | Y       | 2.8                      |
| 2       | F   | T                                                  | JIA-U              | 4.6                        | Anterior                     | Both       | SQ           | 5.1                             | 0.5                              | 1.3                          | Y       | 8.4                      |
| 3       | F   | T                                                  | ACE                | 4.2                        | Anterior                     | Both       | SQ           | 4.6                             | 0.4                              | 2.3                          | Y       | 4.1                      |
| 4       | M   | T                                                  | JIA-U              | 14.5                       | Anterior                     | Both       | PO           | 15.3                            | 0.8                              | 1.8                          | N       | 20.2                     |
| 5       | F   | T                                                  | ACE                | 12.6                       | Anterior<br>and<br>Posterior | Both       | SQ           | 12.9                            | 0.3                              | 1.3                          | N       | 56.1                     |
| 6       | F   | T                                                  | JIA-U              | 6.8                        | Anterior                     | Right      | SQ           | 7.3                             | 0.5                              | 0.4                          | N       | 23.9                     |
| 7       | F   | T                                                  | Unknown            | 8.7                        | Panuveiti<br>s               | Right      | SQ           | 9.8                             | 1.1                              | 1.2                          | Y       | 8.2                      |
| 8       | M   | D                                                  | I-U                | 9.9                        | Intermedi<br>ate             | Both       | SQ           | 11.8                            | 1.9                              | 3.4                          | N       | 5.1                      |
| 9       | F   | T                                                  | Pars<br>planitis   | 12.7                       | Intermedi<br>ate             | Both       | SQ           | 15.1                            | 2.4                              | 3.1                          | Y       | 29.9                     |
| 10      | F   | T                                                  | JIA-U              | 13.0                       | Anterior                     | Right      | PO           | 13.2                            | 0.2                              | 2.5                          | Y       | 14.5                     |
| 11      | F   | T                                                  | JIA-U              | 13.0                       | Anterior                     | Right      | PO           | 17.2                            | 4.2                              | 1.1                          | Y       | 7.1                      |
| 12      | F   | T                                                  | JIA-U              | 2.9                        | Anterior                     | Both       | PO           | 5.2                             | 2.3                              | 0.6                          | Y       | 15.1                     |
| 13      | F   | D                                                  | CAU                | 9.9                        | Anterior                     | Both       | SQ           | 11.4                            | 1.5                              | 1.4                          | Y       | 18.4                     |

D = discontinue, MTX = methotrexate, mos = months, N = no, JIA-U = JIA-associated uveitis, PO = by mouth/oral, SQ = subcutaneous, Yrs = years, T = taper

Y = yes
